# Supplementary material for: Impacts of COVID-19 Sanitary Cues on Hedonic Appreciation of Foods
Source: MDPI journal article supplement (doi:10.3390/foods11121753), 2022-06-14
Supplement: s1 [file s1]

## Flavor Expectation

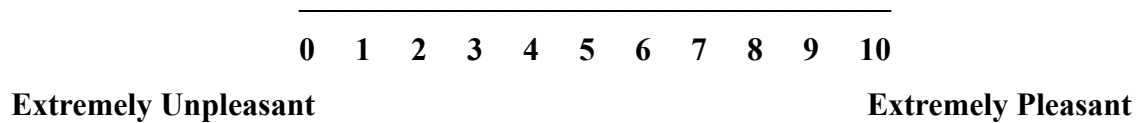

Use the scale below and answer according to the answer that best describes your desire to eat the presented foods at the moment.

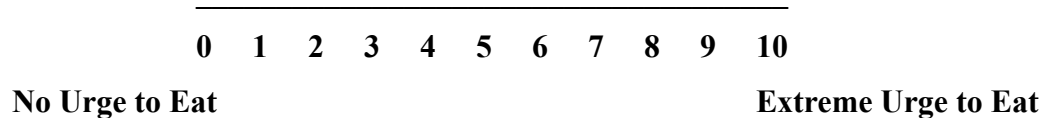

### *1.3 Food Pictures Evaluations*

Consider the food picture immediately presented before each scale set to answer the scales. Namely, how much you desire to eat the food at the moment; how pleasant is the visual aspect of the food; and regarding smell and flavor, that cannot be perceived by the picture, we ask you to respond based on your expectation of pleasantness regarding such attributes.

Use the scales below to answer according to what best describes:

Your desire to eat this food at the moment.

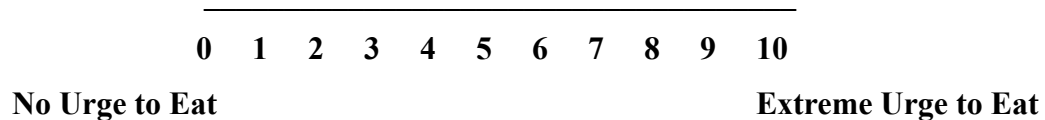

Visual Aspect/Attractiveness

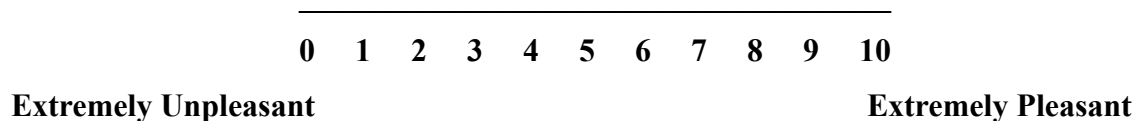

Smell Expectation

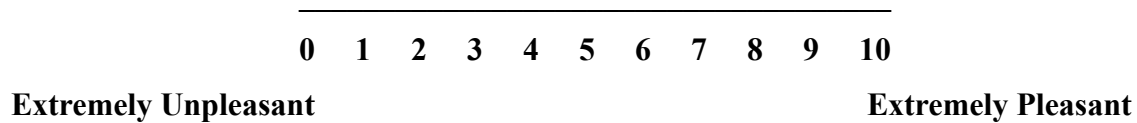

Flavor Expectation

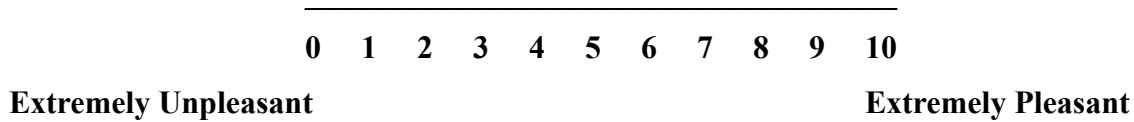

#### *1.4 Final Desire to Eat Evaluation*

Use the scale below and answer according to the answer that best describes your desire to eat at the moment

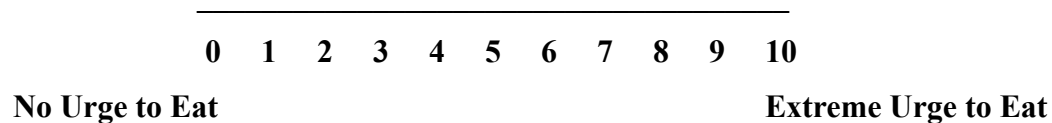

2. Table S1 depicts main results for food pictures regarding all subjective evaluations, i.e. Visual Aspect, Expected Smell, Expected Flavor and Desire to Eat, excluding participants with obesity. As can be seen in Table S2 the observed significant results are in the same direction as in the analysis performed with the obese participants.

| Table S1. Food Picture Evaluations - Main Effects. |          |              |        |           |
|----------------------------------------------------|----------|--------------|--------|-----------|
| Dimensions                                         |          | $F_{(1,81)}$ | p      | $\eta^2p$ |
| Visual Aspect                                      | Priming  | 0.87         | 0.354  | 0.01      |
|                                                    | Tastant  | 78.09        | <0.001 | 0.49      |
|                                                    | Calories | 13.41        | <0.001 | 0.14      |
|                                                    | Priming  | 0.61         | 0.438  | 0.01      |

|                 |          |       |        |       |
|-----------------|----------|-------|--------|-------|
| Expected Smell  | Tastant  | 27.77 | <0.001 | 0.26  |
|                 | Calories | 50.5  | <0.001 | 0.38  |
| Expected Flavor | Priming  | 3.99  | 0.049  | 0.05  |
|                 | Tastant  | 18.99 | <0.001 | 0.19  |
|                 | Calories | 36.08 | <0.001 | 0.31  |
| Desire to Eat   | Priming  | 0.83  | 0.364  | 0.01  |
|                 | Tastant  | 15.45 | <0.001 | 0.16  |
|                 | Calories | 17.48 | <0.001 | 0.018 |

| Table S2. Food Pictures Evaluations - Interaction Effects. |                  |                    |              |                         |
|------------------------------------------------------------|------------------|--------------------|--------------|-------------------------|
| Dimensions                                                 |                  |                    | $t_{(1,81)}$ | $P_{\text{bonferroni}}$ |
| Visual Aspect                                              | Tastant*Calories | Sweet high >       | -7.63        | <0.001                  |
|                                                            |                  | Salty high         |              |                         |
|                                                            |                  | Sweet low >        | -6.94        | <0.001                  |
|                                                            |                  | Salty low          |              |                         |
|                                                            | Tastant*Priming  | Sweet Pandemic >   | -8.05        | <0.001                  |
|                                                            |                  | Salty Pandemic     |              |                         |
|                                                            |                  | Sweet N-Pandemic > | -8.88        | <0.001                  |
|                                                            |                  | Salty N-Pandemic   |              |                         |
|                                                            | Priming*Calories | High N-Pandemic >  | -4.29        | <0.001                  |
|                                                            |                  | Low N-Pandemic     |              |                         |
|                                                            |                  | High Pandemic >    | -2.7         | 0.05                    |
|                                                            |                  | Low Pandemic       |              |                         |

|                   |                              |                         |       |        |
|-------------------|------------------------------|-------------------------|-------|--------|
| Expected<br>Smell | Tastant*Calories*<br>Priming | Sweet high Pandemic. >  | -7.03 | <0.001 |
|                   |                              | Salty high Pandemic     |       |        |
|                   |                              | Sweet low Pandemic >    | -5.73 | <0.001 |
|                   |                              | Salty low Pandemic      |       |        |
|                   |                              | Sweet high N-Pandemic > | -7.29 | <0.001 |
|                   |                              | Salty high N-Pandemic   |       |        |
|                   |                              | Sweet low N-Pandemic >  | -7.33 | <0.001 |
|                   |                              | Salty low N-Pandemic    |       |        |
|                   | Tastant*Calories             | Sweet high >            | -3.61 | 0.003  |
|                   |                              | Salty high              |       |        |
|                   |                              | Sweet low >             | -6.47 | <0.001 |
|                   |                              | Salty low               |       |        |
|                   |                              | Salty high >            | -7.85 | <0.001 |
|                   |                              | Salty Low               |       |        |
|                   | Tastant*Priming              | Sweet Non Pandemic >    | -5.01 | <0.001 |
|                   |                              | Sweet Pandemic          |       |        |
|                   |                              | Sweet N-Pandemic >      | -4.98 | <0.001 |
|                   |                              | Salty N-Pandemic        |       |        |
|                   | Priming*Calories             | High N-Pandemic >       | -6.84 | <0.001 |
|                   |                              | Low N-Pandemic          |       |        |
|                   |                              | High Pandemic >         | -6.87 | <0.001 |
|                   |                              | Low Pandemic            |       |        |
|                   | Tastant*Calories*<br>Priming | Salty high Pandemic     | -6.93 | <0.001 |
|                   |                              | Salty low Pandemic      |       |        |
|                   |                              | Sweet low Pandemic >    | -5.61 | <0.001 |
|                   |                              | Salty low Pandemic      |       |        |

|                    |                              |                          |       |        |
|--------------------|------------------------------|--------------------------|-------|--------|
|                    |                              | Sweet high Pandemic >    | -3.8  | 0.008  |
|                    |                              | Sweet low Pandemic       |       |        |
|                    |                              | Salty high N. Pandemic > | -8.15 | <0.001 |
|                    |                              | Salty low N. Pandemic    |       |        |
|                    |                              | Sweet low N. Pandemic >  | -6.54 | <0.001 |
|                    |                              | Salty low N. Pandemic    |       |        |
| Expected<br>Flavor | Tastant*Calories             | Salty high >             | -7.96 | <0.001 |
|                    |                              | Salty low                |       |        |
|                    |                              | Sweet low >              | -5.37 | <0.001 |
|                    |                              | Salty low                |       |        |
|                    | Tastant*Priming              | Sweet Pandemic >         | -3.35 | 0.007  |
|                    |                              | Salty Pandemic           |       |        |
|                    |                              | Sweet N-Pandemic >       | -4.98 | <0.001 |
|                    |                              | Salty N-Pandemic         |       |        |
|                    | Priming*Calories             | High N-Pandemic >        | -6.62 | <0.001 |
|                    |                              | Low N-Pandemic           |       |        |
|                    |                              | High Pandemic >          | -5.16 | <0.001 |
|                    |                              | Low Pandemic             |       |        |
|                    |                              | High N-Pandemic >        | -3.01 | 0.021  |
|                    |                              | High Pandemic            |       |        |
|                    | Tastant*Calories*<br>Priming | Salty high Pandemic      | -6.7  | <0.001 |
|                    |                              | Salty low Pandemic       |       |        |
|                    |                              | Sweet low Pandemic >     | -5.12 | <0.001 |
|                    |                              | Salty low Pandemic       |       |        |
|                    |                              | Sweet high N-Pandemic >  | -3.95 | 0.003  |
|                    |                              | Sweet high Pandemic      |       |        |

|               |                              |                          |       |        |
|---------------|------------------------------|--------------------------|-------|--------|
| Desire to Eat |                              | Sweet low N. Pandemic >  | -6.12 | <0.001 |
|               |                              | Salty low N. Pandemic    |       |        |
|               |                              | Salty high N. Pandemic > | -7.27 | <0.001 |
|               |                              | Salty low N. Pandemic    |       |        |
|               | Tastant*Calories             | Salty high >             | -6.05 | <0.001 |
|               |                              | Salty low                |       |        |
|               |                              | Sweet low >              | -4.73 | <0.001 |
|               |                              | Salty low                |       |        |
|               | Tastant*Priming              | Sweet N-Pandemic >       | -4.87 | <0.001 |
|               |                              | Salty N-Pandemic         |       |        |
|               | Priming*Calories             | High N-Pandemic >        | -4.37 | <0.001 |
|               |                              | Low N-Pandemic           |       |        |
|               |                              | High Pandemic >          | -3.52 | 0.004  |
|               |                              | Low Pandemic             |       |        |
|               | Tastant*Calories*<br>Priming | Salty high Pandemic      | -4.89 | <0.001 |
|               |                              | Salty low Pandemic       |       |        |
|               |                              | Sweet low Pandemic >     | -3.82 | 0.005  |
|               |                              | Salty low Pandemic       |       |        |
|               |                              | Salty high N. Pandemic > | -5.61 | <0.001 |
|               |                              | Salty low N. Pandemic    |       |        |
|               |                              | Sweet low N. Pandemic >  | -6.15 | <0.001 |
|               |                              | Salty low N. Pandemic    |       |        |

3. Pairwise comparison for all dimensions evaluated post video comparing Pandemic and Non-pandemic conditions excluding Participants with Obesity (n = 82).

| Table S3. T-test Results for video evaluations (excluding obese participants). |                              |              |        |           |
|--------------------------------------------------------------------------------|------------------------------|--------------|--------|-----------|
| Comparisons                                                                    |                              | $t_{(1,81)}$ | p      | Cohen's d |
| Pandemic Visual Aspect                                                         | Non-Pandemic Visual Aspect   | 3.53         | <0.001 | 0.39      |
| Pandemic Expected Smell                                                        | Non-Pandemic Expected Smell  | 2.27         | 0.026  | 0.25      |
| Pandemic Expected Flavor                                                       | Non-Pandemic Expected Flavor | 2.3          | 0.015  | 0.27      |

4. Analysis on Desire to Eat at different time-points of the task, excluding obese participants, showed similar results as when including these participants in the analyses. These results are described in Tables S4 and S5 and also depicted at Figure S1.

| Table S4. Desire to Eat in Different Time-points -Main Effects (excluding obese participants). |         |                      |        |           |
|------------------------------------------------------------------------------------------------|---------|----------------------|--------|-----------|
|                                                                                                |         |                      | p      | $\eta^2p$ |
| Desire to Eat                                                                                  | Time    | $F_{(1,81)} = 15.72$ | <0.001 | 0.16      |
|                                                                                                | Priming | $F_{(1,81)} = 1.01$  | 0.318  | 0.01      |
| Time*Priming                                                                                   |         | $F_{(2,162)} = 4.82$ | 0.009  | 0.06      |

| Table S5. Desire to Eat in Different Time-points - Post hoc on interaction effects (excluding |
|-----------------------------------------------------------------------------------------------|
|-----------------------------------------------------------------------------------------------|

| obese participants). |              |                                                    |                |                         |
|----------------------|--------------|----------------------------------------------------|----------------|-------------------------|
| Dimensions           |              |                                                    | $t_{(2,1.92)}$ | $p_{\text{bonferroni}}$ |
| Desire to Eat        | Time*Priming | Final DtE Pandemic><br>Initial DtE Pandemic        | -4.93          | <0.001                  |
|                      |              | Final DtE N-Pandemic><br>Post video DtE N-Pandemic | -3.56          | 0.006                   |
|                      |              | Initial DtE N-Pandemic ><br>Final DtE N-Pandemic   | -4.39          | <0.001                  |
|                      |              | Final DtE Pandemic><br>Post video DtE Pandemic     | -4.05          | <0.001                  |

Figure S1. *Desire to Eat in the Different Time-Points of Evaluation (excluding obese participants).*

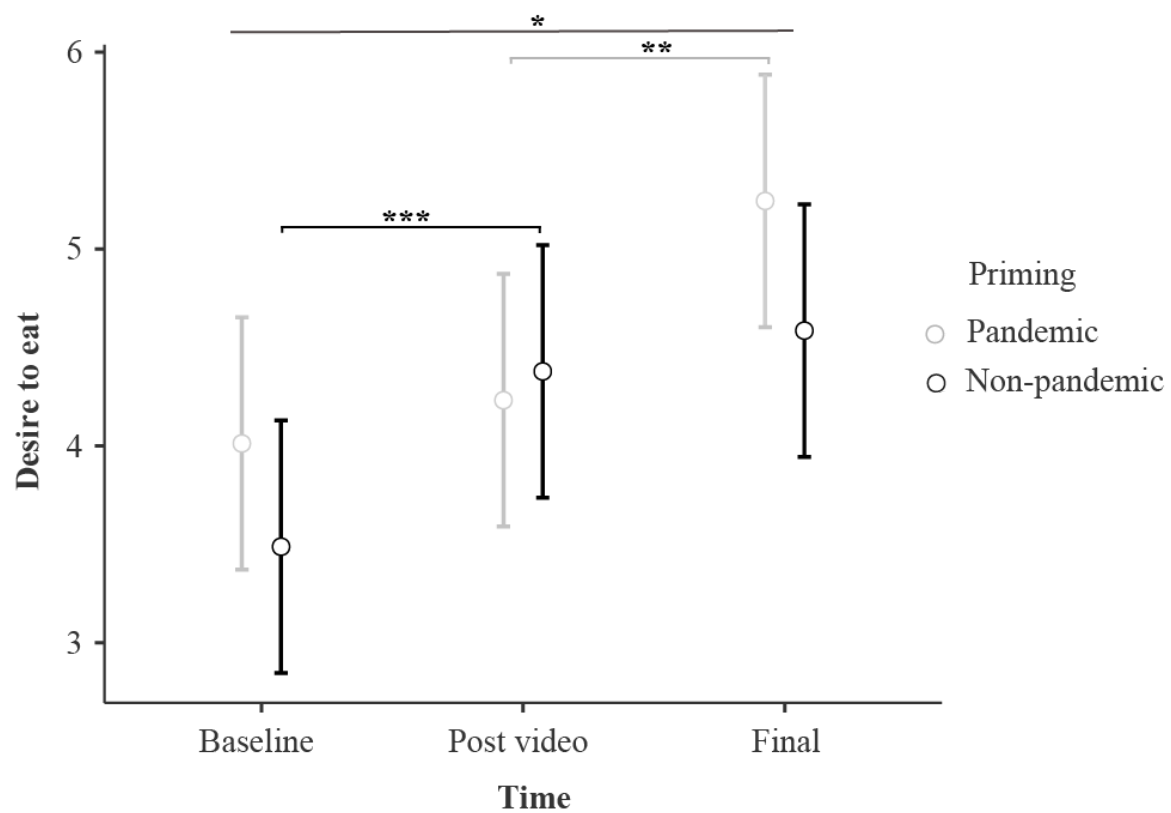

*Note.* Image depicting the main effects of desire to eat along the task considering different time-points. Namely, the (\*) Final assessment, after the end of the task showed higher desire to eat when compared to the assessment before the procedures on both Pandemic condition and Non-pandemic conditions, (\*\*) postpriming evaluation at Pandemic condition showed higher desire to eat when compared to the after video evaluation, (\*\*\*) and post priming at Non-Pandemic condition compared to baseline assessment on the same condition. Bars indicate confidence intervals (95%)  $p < 0.05$ .
